# Supplementary material
Source: PubMed Central journal article supplement (PMC3346476)
Supplement: supp_78.9.3166_AEM-AEM07249-11-s01.pdf [file supp_78.9.3166_AEM-AEM07249-11-s01.pdf]

1 **SUPPLEMENTARY INFORMATION**

2 **Running title:** NRPS and *Aspergillus fumigatus* ergot alkaloid biosynthesis

3 **Non-Ribosomal Peptide Synthetases *pesL* and *pesI* are essential for Fumigaclavine C**  
4 **production in *Aspergillus fumigatus***

5 **Karen A. O’Hanlon<sup>1#</sup>, Lorna Gallagher<sup>1#</sup>, Markus Schrettl<sup>1,2</sup> Christoph Jöchl<sup>1,2</sup>, Kevin**  
6 **Kavanagh<sup>1</sup>, Thomas O. Larsen<sup>3</sup>, and Sean Doyle<sup>1\*</sup>.**

7 <sup>1</sup>Department of Biology and National Institute for Cellular Biotechnology, National University  
8 of Ireland Maynooth, Co. Kildare, Ireland.

9 <sup>2</sup>Division of Molecular Biology/Biocenter, Innsbruck Medical University, Innsbruck, Austria.

10 <sup>3</sup>Center for Microbial Biotechnology, DTU Systems Biology, Technical University of  
11 Denmark, Kgs. Lyngby, Denmark.

12  
13 **\*Corresponding author**

14 Professor Sean Doyle,

15 Department of Biology and

16 National Institute for Cellular Biotechnology,

17 National University of Ireland Maynooth,

18 Co. Kildare,

19 Ireland.

20 Tel: +353-1-7083858; Fax: +353-1-7083845; E-mail: sean.doyle@nuim.ie

21 Web:<http://biology.nuim.ie>

22 <sup>#</sup>These authors contributed equally to this work.

1  
A.

Wild-type ( $\DeltaakuB$ )

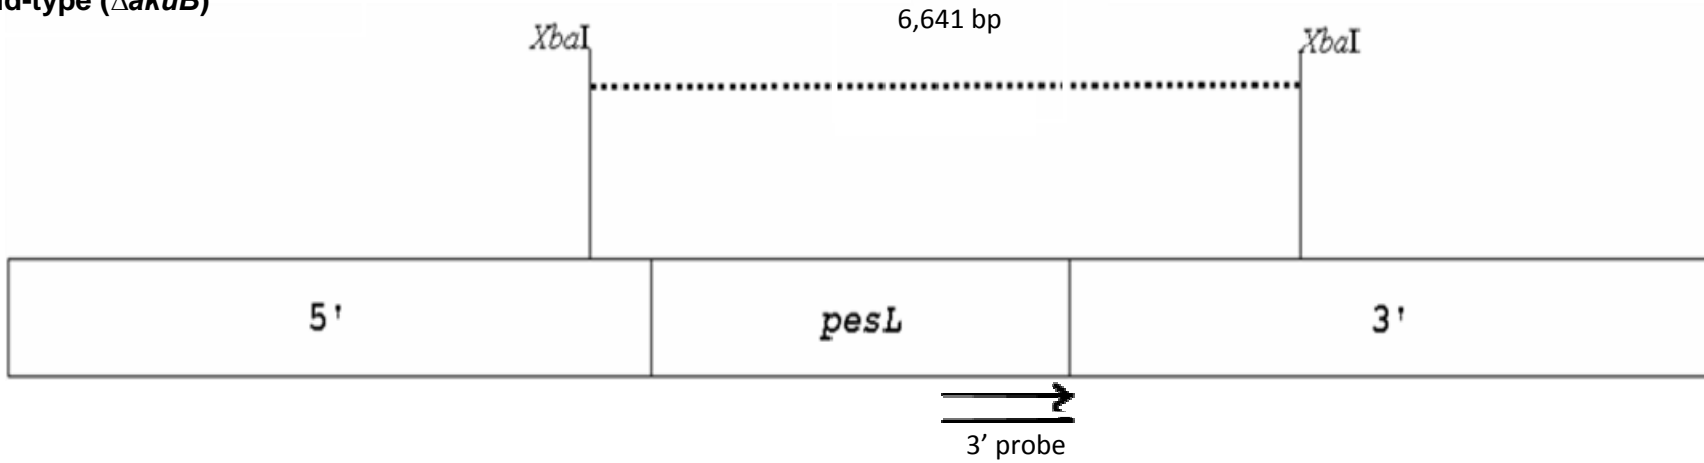

2

3

$\Delta pesL$

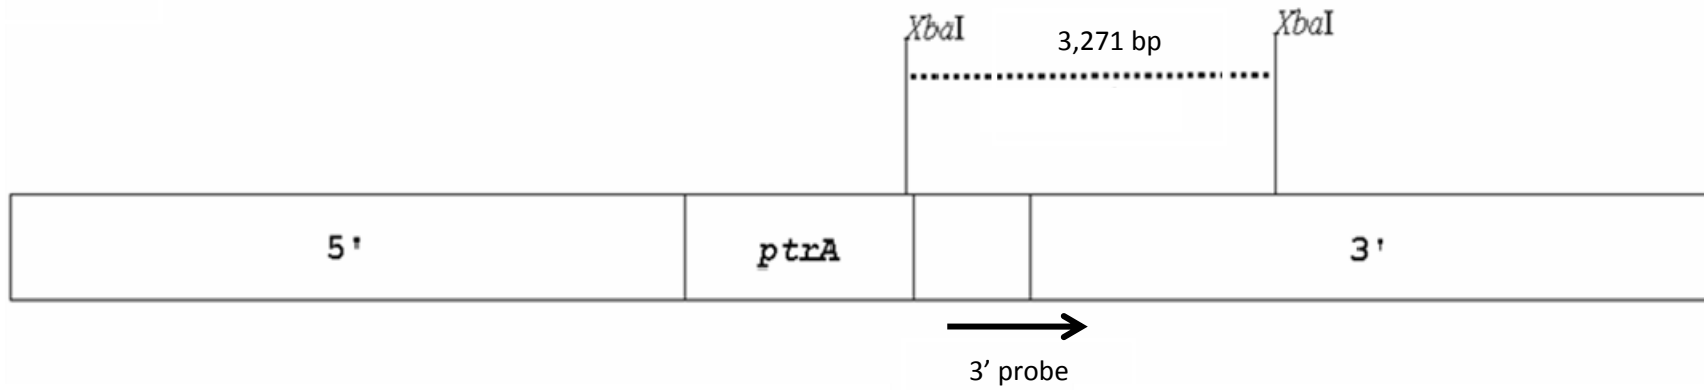

4

1

2

Wild-type ( $\DeltaakuB$  / ATCC46645)

1 kb

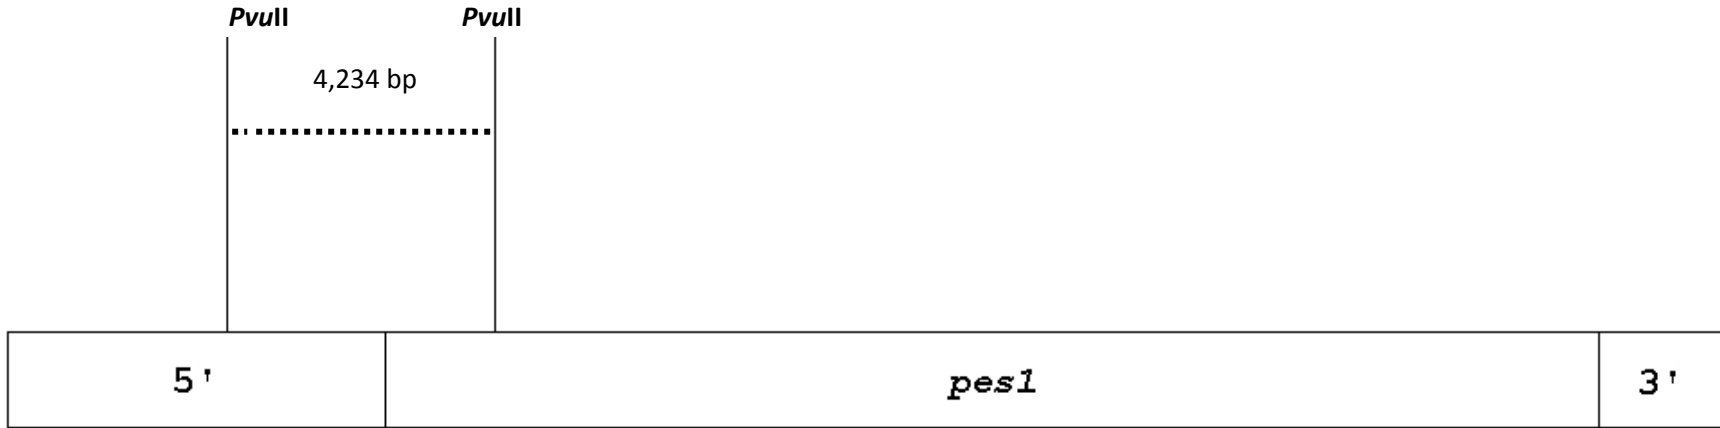

3

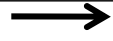

5' probe

4

5

6

7

8

1

*Δpes1*

*PvuII*      *PvuII*

1,922 bp

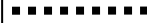

2

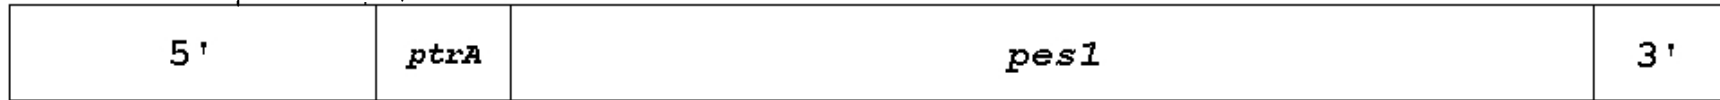

3

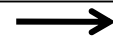

5' probe

1 kb

**B.**

**(a) *pesL* deletion**

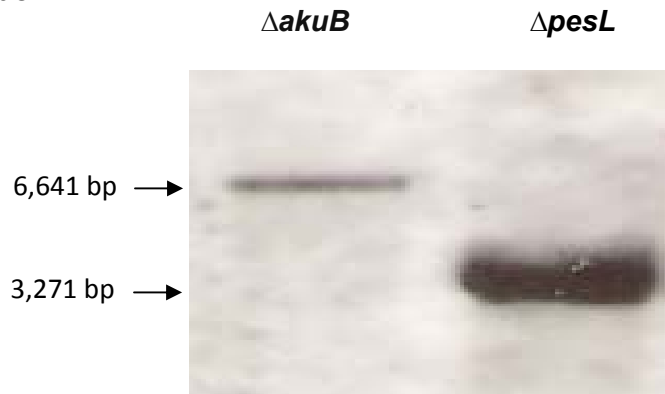

**(b) *pes1* deletion (ΔakuB)**

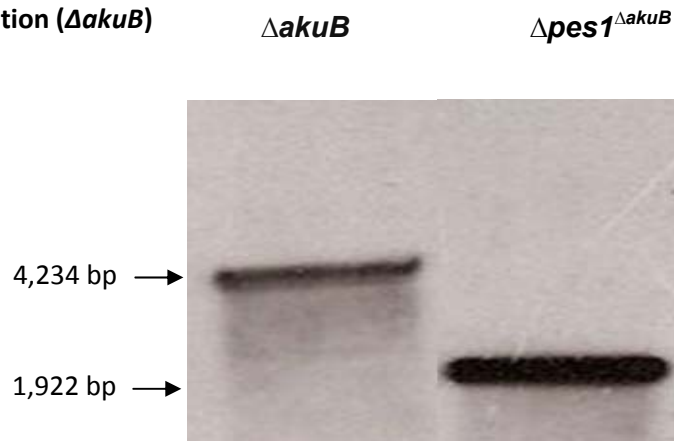

**(c) *pes1* deletion (ATCC46645)**

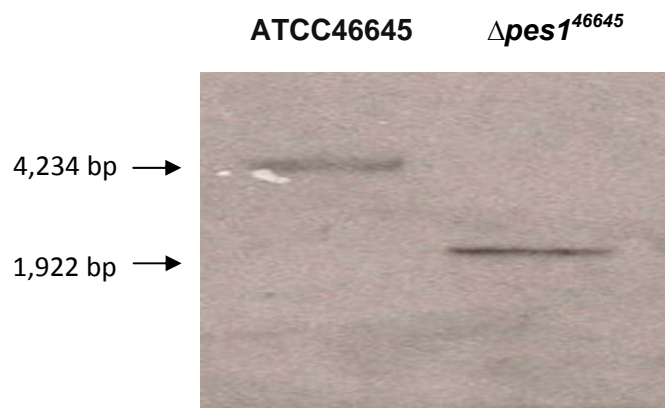

**Supplementary Figure 1. Confirmation of *pesL* and *pes1* deletion. A.** Schematic representation of Southern blots and probe hybridisation for *A. fumigatus* ΔakuB and

*ΔpesL*, or *A. fumigatus* wild-type and *Δpes1* is indicated, displaying the *pesL* or *pes1* locus in wild-type and respective mutant strains. **pesL:** *XbaI* restricted DNA was subjected to hybridisation with a 1,171 bp DIG-labelled probe corresponding to a region at the 3' end of *pesL* leading to fragments of 6,641 bp in *ΔakuB* and 3,271 bp in *ΔpesL*. For **pes1**, *PvuII* restricted DNA was hybridised with a 1,236 bp 5' probe, leading to fragments of 4,234 bp in *ΔakuB* and ATCC46645 and 1,922 bp in *Δpes1*. Probe hybridisation regions are indicated with black arrows. **B.** Southern blot analysis of *A. fumigatus* wild-type and mutant strains confirms *pesL* and *pes1* deletions in *A. fumigatus*, by the presence of the expected hybridisation patterns as described in (A), where (a) shows analysis of *A. fumigatus* *ΔakuB* and *ΔpesL* (b) shows analysis of *A. fumigatus* *ΔakuB* and *Δpes1*<sup>*ΔakuB*</sup> and (c) shows analysis of *A. fumigatus* ATCC46645 and *Δpes1*<sup>46645</sup>.

A.

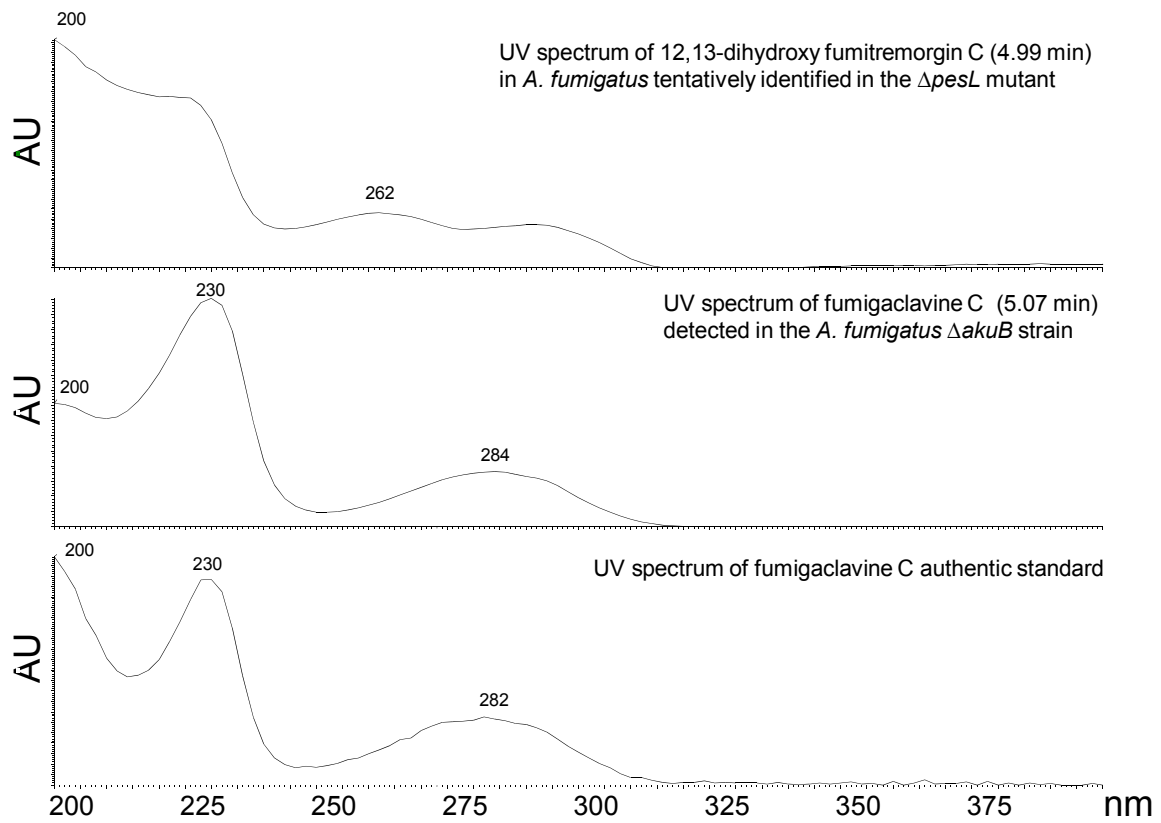

**B.**

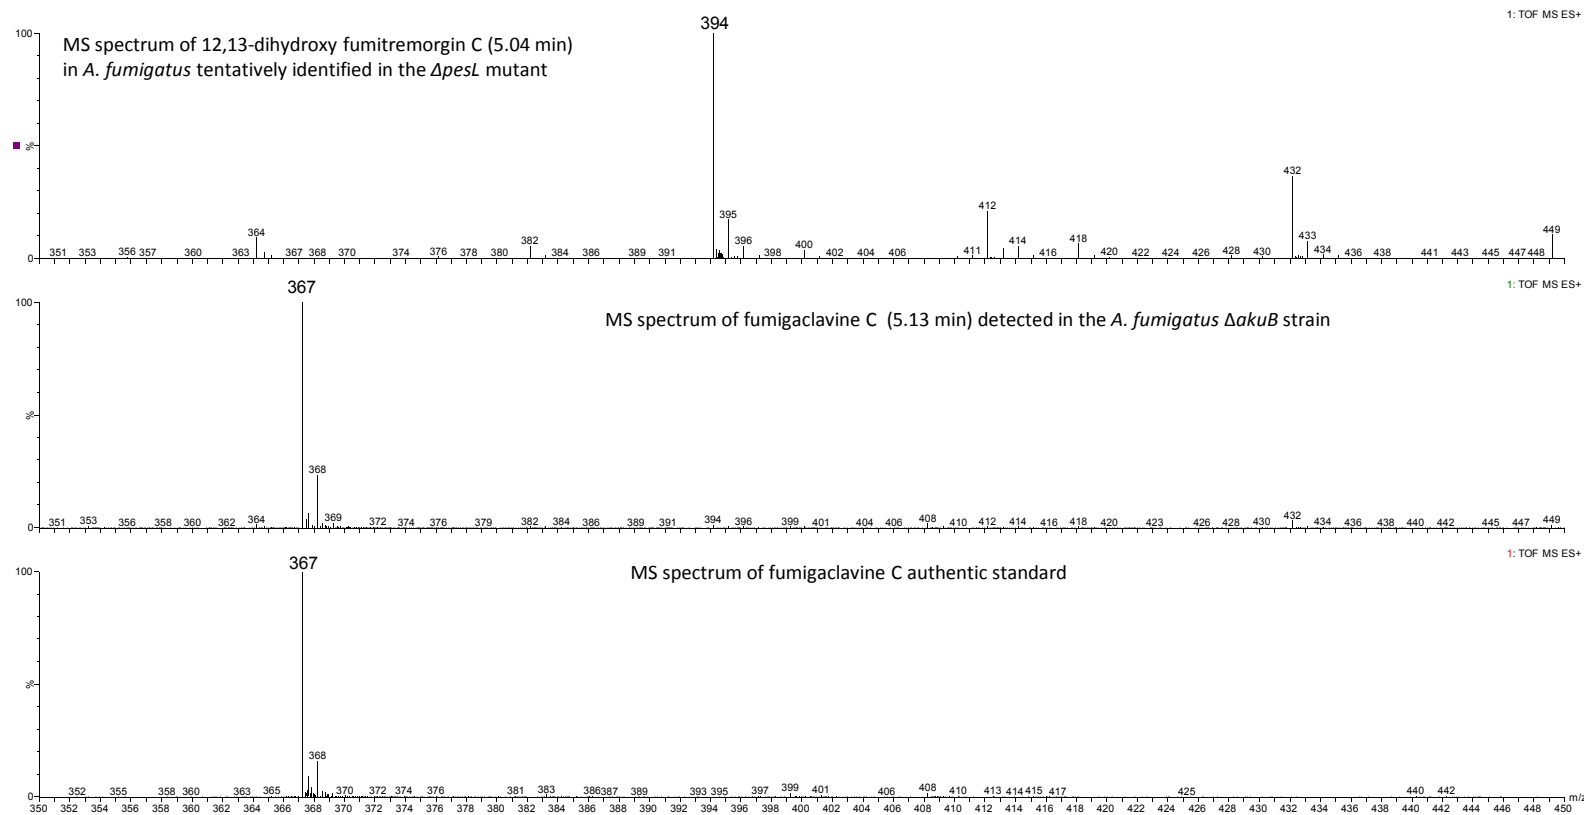

**Supplementary Figure 2. A.** UV spectra of 12,13-dihydroxy fumitremorgin C (top) at 4.99 min peak, fumigaclavine C (middle) at 5.07 min peak, both in FIG. 2, compared to the UV spectrum of an authentic standard of fumigaclavine C. **B.** MS spectra of 12,13-dihydroxy fumitremorgin C (top) at 5.04 min peak, fumigaclavine C (middle) at 5.13 min peak, both in FIG. 2, compared to the MS spectrum of an authentic standard of fumigaclavine C



Czapek <

TOL00198

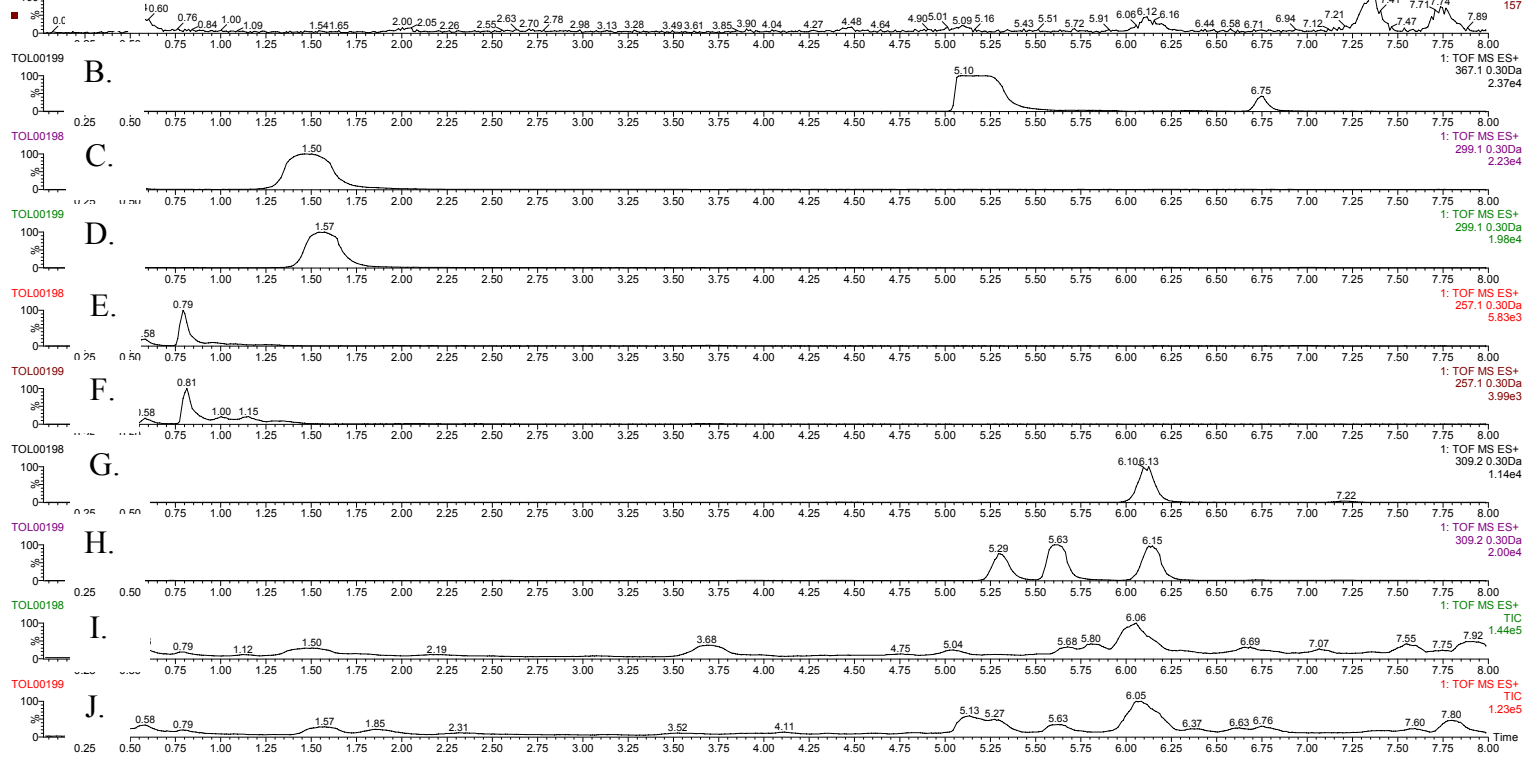

**Supplementary Figure 3.** Mass ion profiling analysis of fumigaclavines in *Aspergillus fumigatus*  $\DeltaakuB$  strain (TOL00199) and  $\Delta pesL$  (TOL00198).

A: Ion trace (m/z 367.1 Da,  $[M+H]^+$ ) illustrating absence of fumigaclavine C in *Aspergillus fumigatus* in the  $\Delta pesL$  mutant.

B: Ion trace (m/z 367.1 Da,  $[M+H]^+$ ) illustrating presence of fumigaclavine C in *Aspergillus fumigatus*  $\DeltaakuB$ .

C: Ion trace (m/z 299.1 Da,  $[M+H]^+$ ) illustrating presence of fumigaclavine A in  $\Delta pesL$ .

D: Ion trace (m/z 299.1 Da,  $[M+H]^+$ ) illustrating presence of fumigaclavine A in  $\DeltaakuB$ .

E: Ion trace (m/z 257.1 Da,  $[M+H]^+$ ) illustrating presence of fumigaclavine B in  $\Delta pesL$ .

F: Ion trace (m/z 257.1 Da,  $[M+H]^+$ ) illustrating presence of fumigaclavine B in  $\DeltaakuB$ .

G: Ion trace (m/z 309.2 Da,  $[M+H]^+$ ) illustrating absence of two likely isomers (RT: 5.29 and 5.63 min) of 9-deoxy fumigaclavine C in  $\Delta pesL$ .

H: Ion trace (m/z 309.2 Da,  $[M+H]^+$ ) illustrating presence of two likely isomers (RT: 5.29 and 5.63 min) of 9-deoxy fumigaclavine C in  $\DeltaakuB$ .

I: Total ion chromatogram (TIC) of metabolite extracts of the *Aspergillus fumigatus*  $\Delta pesL$  from growth on Czapek medium.

J: Total ion chromatogram (TIC) of metabolite extracts of the *Aspergillus fumigatus*  $\DeltaakuB$  from growth on Czapek medium.

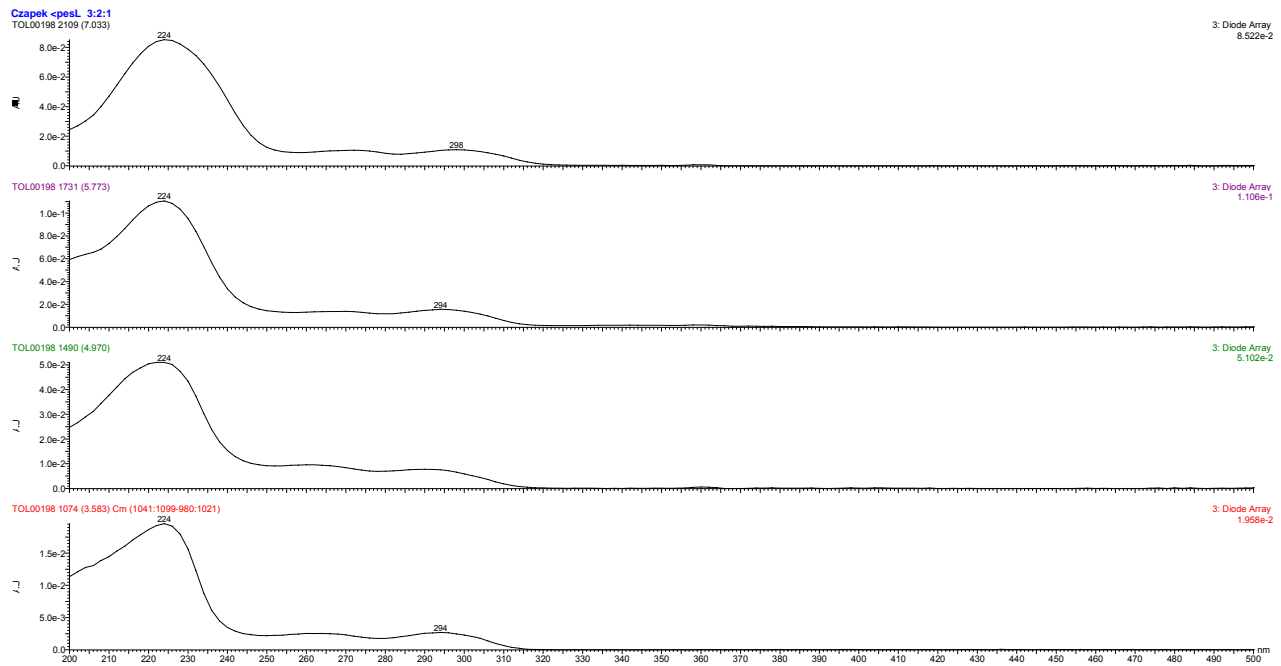

**Supplementary Figure 4.** UV spectra of likely biosynthetically related compounds present in both *A. fumigatus*  $\DeltaakuB$  and  $\Delta pesL$  conidial extracts (FIG. 3 manuscript). All UV spectra are very similar and indicate fumitremorgins (1).

## A. DAD

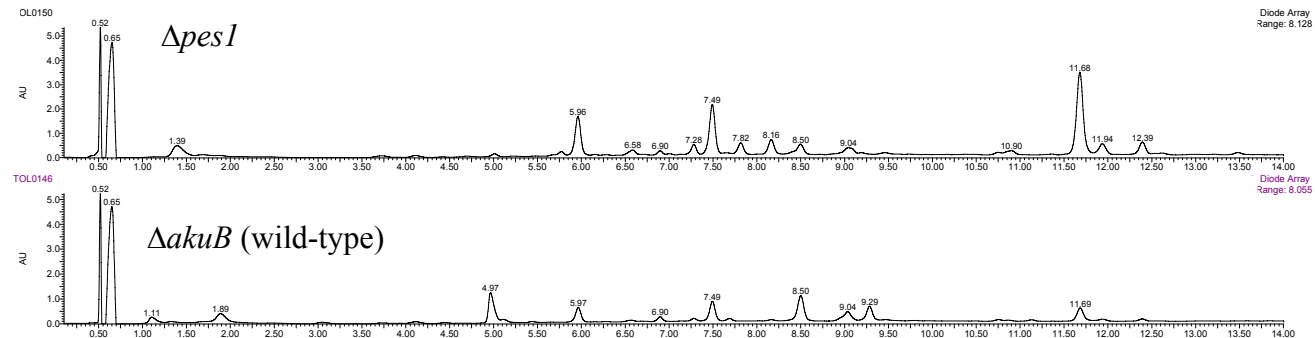

## B. TIC

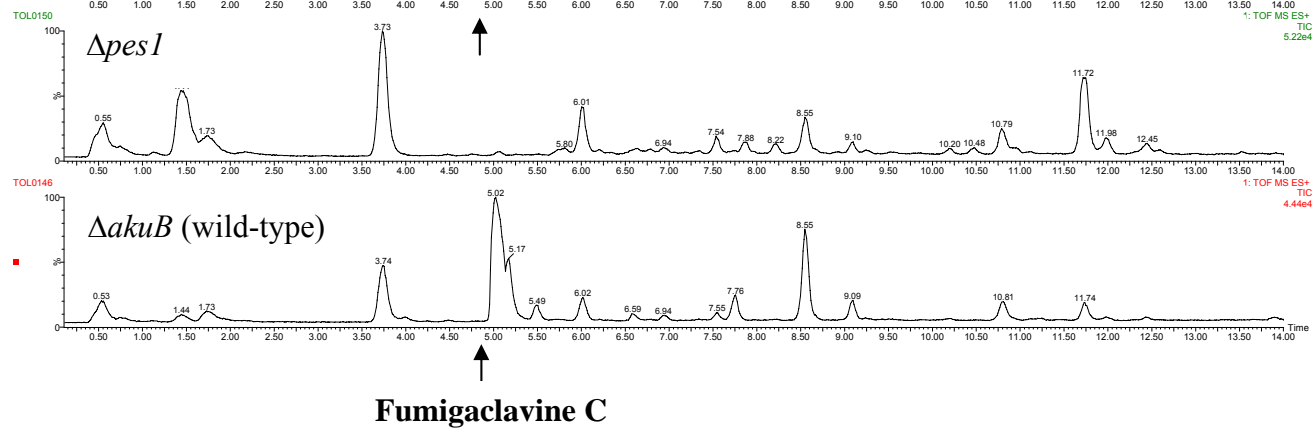

**Supplementary Figure 5. *Pes1* is essential for fumigaclavine C biosynthesis.** **A.** Diode array detection (DAD) based chromatogram of *A. fumigatus Δpes1* (upper). Notice the absence of the peak for fumigaclavine C (Rt: 4.97 min). Diode array based chromatogram of the *ΔakuB* (lower) fumigaclavine C (Rt: 4.97 min) is present. **B.** Total ion chromatogram (TIC) of the *Δpes1* mutant. Notice the absence of the peak for fumigaclavine C (Rt: 5.02 min). Total ion chromatogram of *ΔakuB* confirms the presence of fumigaclavine C (Rt: 5.02 min) (lower TIC).

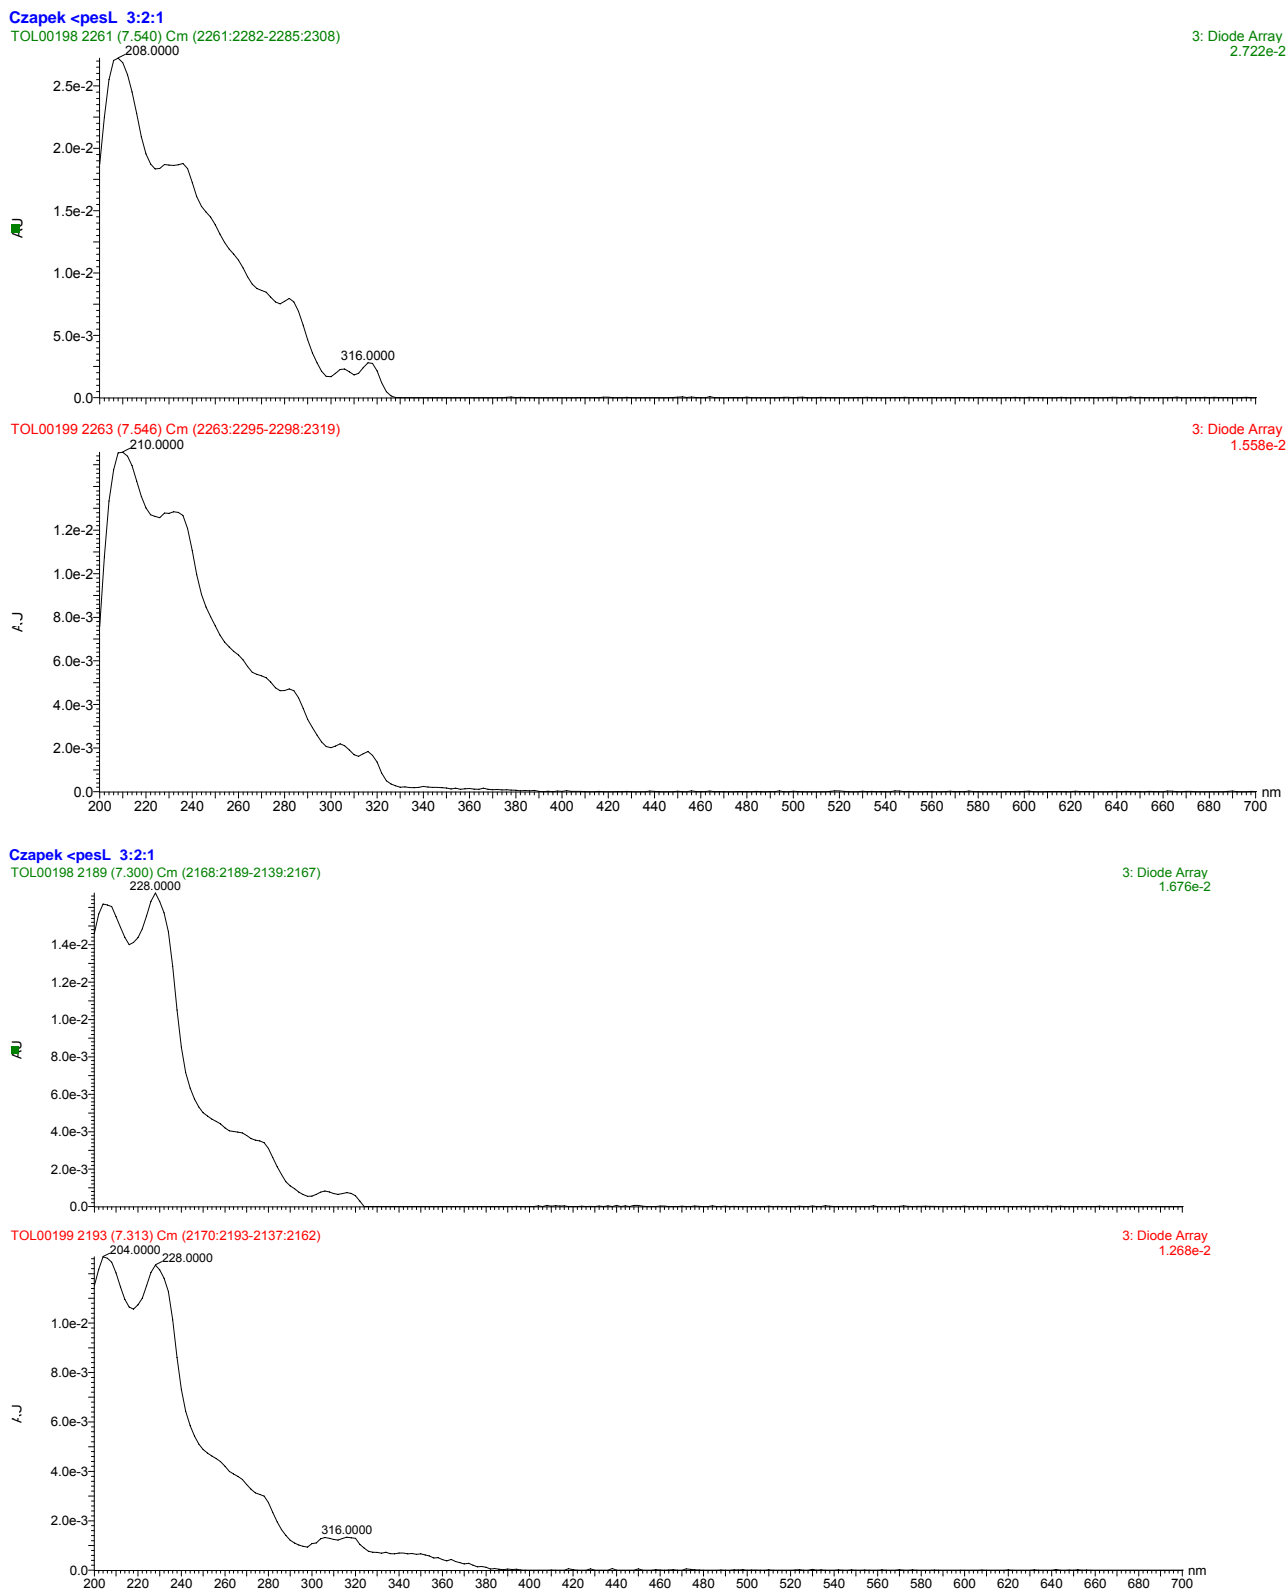

**Supplementary Figure 6.** UV spectra of fumiquinazonines C/D (Rt: ca. 7.5 min) and fumiquinazolines A/B (Rt: ca. 7.3 min) in *Aspergillus fumigatus*  $\DeltaakuB$  (TOL00199) and  $\Delta pesL$  mutant (TOL00198).

**SUPPLEMENTARY TABLE 1. OLIGONUCLEOTIDE PRIMERS USED DURING THIS STUDY**

| <b>Primer Name</b> | <b>Sequence 5'-3'</b>       |
|--------------------|-----------------------------|
| <i>opesL</i> 1     | GTCTATCAGCACACCCTTACCG      |
| <i>opesL</i> 2     | AACTCCGCTTCACAGACC          |
| <i>opesL</i> 3     | CCTGTTGCTCGACATTCC          |
| <i>opesL</i> 4     | AATCTGCAGGACAACGCAGCATCAAGG |
| <i>opesL</i> 5     | GATTCTGCCTTGGATGCG          |
| <i>opesL</i> 6     | TCAGGTCCCTTCTCACAC          |
| <i>opes1</i> 1     | GTCGGCATCGGACATCTAC         |
| <i>opes1</i> 2     | CTGTAGCTTCTGGCCGAG          |
| <i>opes1</i> 3     | GCGGTACCCAAGGCATTGGTCTCACTG |
| <i>opes1</i> 4     | GACGATCGGTACCATCTGCCACTCAC  |
| <i>opes1</i> 5     | CATGCAATCAAGGATATGG         |
| <i>opes1</i> 6     | CCTTGCACTACCAATGCTG         |
| OPtrA1             | GAGGACCTGGACAAGTAC          |
| OPtrA2             | CATCGTGACCAGTGGTAC          |
| <i>pes1</i> RT-F   | TACCCATGGACCCAAGTCAT        |
| <i>pes1</i> RT-R   | TTGTGGGAAGATCTGGAAGG        |
| <i>pesL</i> RT-F   | GGGCCGCTATATACCACAGA        |
| <i>pesL</i> RT-R   | AAGAGGAGTGCCACCAACAC        |
| AFUA_6G12040 RT-F  | TCTATGCCACGGTTGGTGTA        |
| AFUA_6G12040 RT-R  | ATTGCCCGAATCGACATTAT        |
| AFUA_6G12060 RT-F  | GTGTCTTTGCGTTTCCAAT         |
| AFUA_6G12060 RT-R  | ATGTGTCCTCCACCCGATAA        |
| AFUA_6G12070 RT-F  | TCATGGGGTCCAATGAAGAT        |

---

|                   |                               |
|-------------------|-------------------------------|
| AFUA_6G12070 RT-R | TGGCTGCATCTGTTCTTCTG          |
| AFUA_6G12080 RT-F | TCATGGGGTCCAATGAAGAT          |
| AFUA_6G12080 RT-R | TGGCTGCATCTGTTCTTCTG          |
| <i>calm</i> F     | CCGAGTACAAGGAAGCTTTCTC        |
| <i>calm</i> R     | GAATCATCTCGTCGATTCGTCGTCTCAGT |

---

**SUPPLEMENTARY TABLE 2. SUMMARY OF THE FUMIQUINAZOLINE COMPOUNDS**

| <b>Compound</b>   | <b>Molecular formula</b>                                      | <b>M/Z</b> | <b>Retention time (RP-HPLC)<br/>– this study</b> |
|-------------------|---------------------------------------------------------------|------------|--------------------------------------------------|
| Fumiquinazoline A | C <sub>24</sub> H <sub>23</sub> N <sub>5</sub> O <sub>4</sub> | 445.1744   | 7.32-7.34 min                                    |
| Fumiquinazoline B | C <sub>24</sub> H <sub>23</sub> N <sub>5</sub> O <sub>4</sub> | 445.1744   | 7.32-7.34 min                                    |
| Fumiquinazoline C | C <sub>24</sub> H <sub>21</sub> O <sub>4</sub> N <sub>5</sub> | 443.1588   | 7.6 min                                          |
| Fumiquinazoline D | C <sub>24</sub> H <sub>21</sub> O <sub>4</sub> N <sub>5</sub> | 443.1588   | 7.6 min                                          |
| Fumiquinazoline F | C <sub>21</sub> H <sub>18</sub> O <sub>2</sub> N <sub>5</sub> | 358.1430   | 6.12-6.15 min                                    |
| Fumiquinazoline G | C <sub>21</sub> H <sub>18</sub> O <sub>2</sub> N <sub>5</sub> | 358.1430   | 6.12-6.15 min                                    |

## References

**1. Larsen, T. O., J. Smedsgaard, K. F. Nielsen, M. A. Hansen, R. A. Samson, and J. C. Frisvad.** 2007. Production of mycotoxins by *ASPERGILLUS LENTULUS* and other medically important and closely related species in section Fumigati. *Med. Mycol.* **45**:225-232.
